# Supplementary material for: The Arabidopsis COX11 Homolog is Essential for Cytochrome c Oxidase Activity
Source: PubMed Central journal article supplement (PMC4683207; doi:10.3389/fpls.2015.01091), 2015-12-18
Supplement: Image10.pdf [file Image10.pdf]

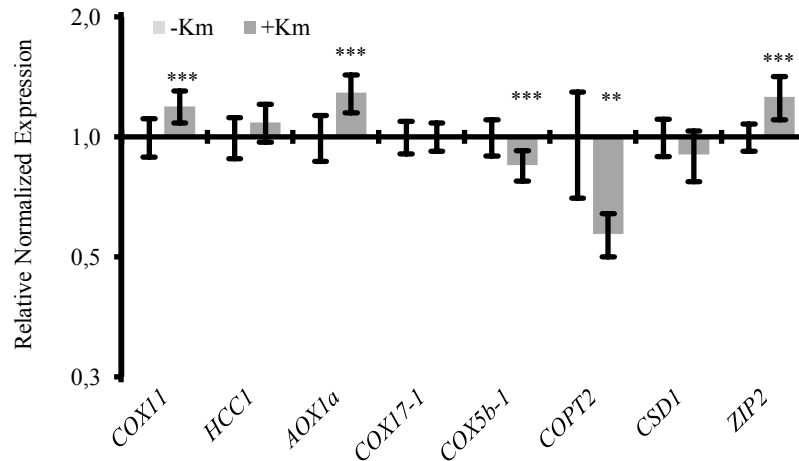

**SUPPLEMENTARY FIGURE 10 | Effect of kanamycin on mRNA levels of genes of interest.** qPCR analysis of expression levels of various genes of interests in kanamycin (Km)-resistant *Arabidopsis* seedlings. The seedlings were grown for 14 days in the absence or presence of Km. They represent a line homozygous for the *35S:GUS* construct. Mean values of mRNA levels in Km-treated seedlings were normalized to control seedlings and plotted on a logarithmic scale (base two). Values and statistical significance (compared with the control, \*\*P < 0.01, \*\*\*P < 0.001) were calculated with the CFX manager software. Error bars represent  $\pm$  SD. Individual values are listed in the **Supplementary Table 5**.
