# Supplementary material for: The Arabidopsis COX11 Homolog is Essential for Cytochrome c Oxidase Activity
Source: PubMed Central journal article supplement (PMC4683207; doi:10.3389/fpls.2015.01091), 2015-12-18
Supplement: Image11.pdf [file Image11.pdf]

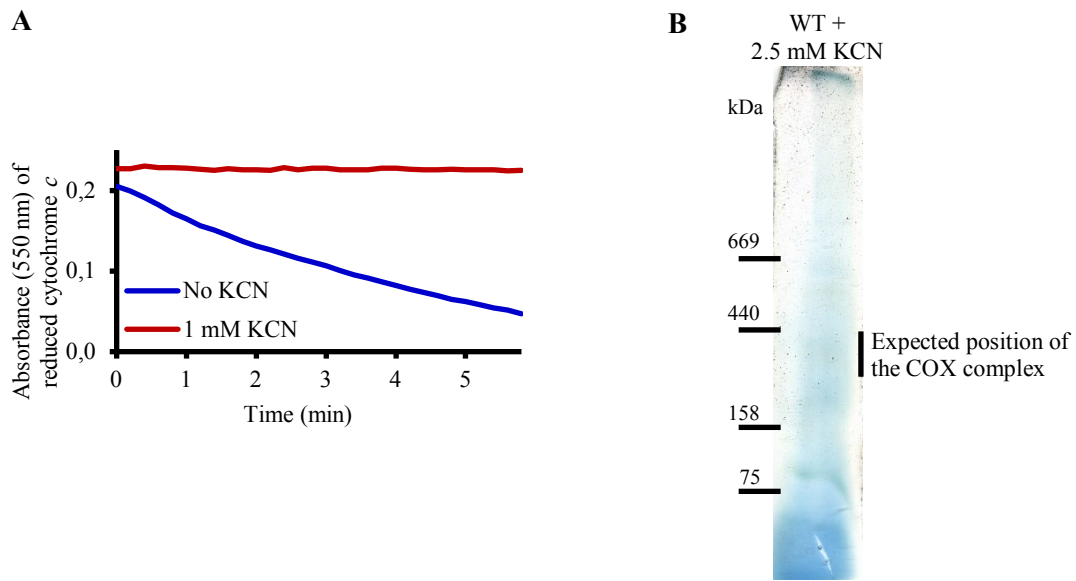

**SUPPLEMENTARY FIGURE 11 | Specific inhibition of COX complex activity by KCN. (A)** Exemplary COX activity measurement with 10  $\mu$ g of WT mitochondrial protein in the presence (red line) or absence (blue line) of 1 mM KCN. **(B)** Mitochondrial complexes from WT plants were separated by gradient BN-PAGE and subsequently stained in gel for COX complex activity in the presence of 2.5 mM KCN, as a control for the specificity of the activity staining.
