# Supplementary material for: The Arabidopsis COX11 Homolog is Essential for Cytochrome c Oxidase Activity
Source: PubMed Central journal article supplement (PMC4683207; doi:10.3389/fpls.2015.01091), 2015-12-18
Supplement: Image13.pdf [file Image13.pdf]

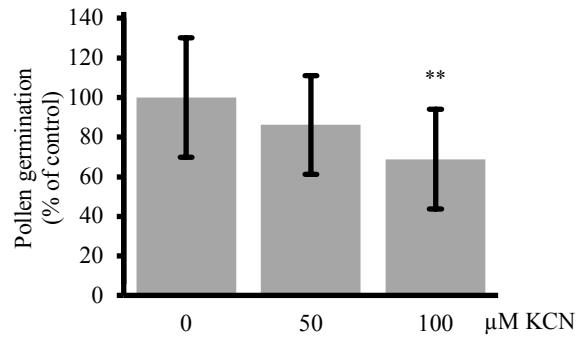

**SUPPLEMENTARY FIGURE 13 | Influence of KCN on pollen germination.** Germination rates of WT pollen treated with KCN, normalized to the untreated control (= 100%). Error bars represent  $\pm$  SD of means from five experiments. For each experiment, germination of 100 – 300 pollen grains was evaluated in duplicates or triplicates. Asterisks indicate statistical significance calculated with the Student's *t* test (\*\* $P < 0.01$ ). Exact values are given in **Supplementary Table 5**.
